# Supplementary material for: Effect of mulching and organic manure on maize yield, water, and nitrogen use efficiency in the Loess Plateau of China
Source: PeerJ. 2024 Dec 3;12:e18644. doi: 10.7717/peerj.18644 (PMC11623062; doi:10.7717/peerj.18644)
Supplement: Supplemental Information 1 [file peerj-12-18644-s001.xls]

## Sheet: nitrate-N balance
Treatment		Ninitial	Ninput	Nmin	Nuptake	Nresidual	Nloss
2012	CK	66.34±4.25	0	20.2168	56.2343	30.3226	0
	T0	66.34±4.25	0	20.6979	52.3635	34.6744	0
	T1	66.34±4.25	80	20.2168	75.6485	61.2462	29.6621
	T2	66.34±4.25	80	20.6979	80.6287	64.7501	21.6591
	T3	66.34±4.25	160	20.2168	105.267	85.9744	55.3158
	T4	66.34±4.25	160	20.6979	112.724	102.054	32.2591
2013	CK	56.87±3.75	0	18.8186	52.9517	22.7369	0
	T0	56.87±3.75	0	13.1088	52.3474	17.6314	0
	T1	56.87±3.75	80	18.8186	69.3769	46.0209	40.2908
	T2	56.87±3.75	80	13.1088	72.549	52.9092	24.5205
	T3	56.87±3.75	160	18.8186	98.2024	67.3747	70.1115
	T4	56.87±3.75	160	13.1088	109.248	96.3781	24.3531

## Sheet: grain yield
Treatment		GY			Mean			Ninitial	Ninput	Nmin	DM			Mean				Nuptake			Mean					Nresidual			Mean					Nloss			Mean					REU			Mean
2014	CK	5436.8	4896.3	5942.5	5425.2	523.196		55.89	0	43.24	17453	18977	19121	18517	924.26			51.4767	53.0067	52.6072	52.3635	0.79358	d	±	52.36±0.79d	47.6533	46.1233	46.5228	46.7665	0.79358	d	±	46.77±0.79d	0	0	0	0	0		±	―	―	―	―	―	―		±	―
	T0	8633.7	8286.3	8757.2	8559.07	244.16		55.89	160	43.24	20124	19777	20993	20298	626.395			93.69	84.57	94.52	90.9267	5.52066	c	±	90.93±5.52c	89.75	105.41	99.34	98.17	7.89566	c	±	98.17±7.9c	75.69	69.15	65.27	70.0367	5.26628	a	±	70.04±5.27a	0.469938	0.510812	0.535062	0.505271	0.0329143	d	±	0.51±0.03d
	T1	9726.3	10157.2	9666.5	9850	267.718		55.89	160	43.24	22456	23154	21968	22526	596.091			108.8	112.01	105.47	108.76	3.27018	ab	±	108.76±3.27ab	110.27	98.26	105.12	104.55	6.02526	bc	±	104.55±6.03bc	40.06	48.86	48.54	45.82	4.99087	b	±	45.82±4.99b	0.692625	0.637625	0.639625	0.656625	0.0311929	c	±	0.66±0.03c
	T2	10267.5	9887.3	10852.1	10335.6	485.995		55.89	160	43.24	23199	24511	23100	23603.3	787.619			118.85	106.24	122.57	115.887	8.55881	a	±	115.89±8.56a	124.57	108.45	119.24	117.42	8.21267	a	±	117.42±8.21a	15.71	44.44	17.32	25.8233	16.1426	d	±	25.82±16.14d	0.844812	0.66525	0.83475	0.781604	0.100891	a	±	0.78±0.1a
	T3	9836.4	9987.2	9558.6	9794.07	217.413		55.89	160	43.24	21076	22157	22162	21798.3	625.564			101.32	105.08	109.4	105.267	4.04323	b	±	105.27±4.04b	115.58	106.63	112.94	111.72	4.5987	ab	±	111.72±4.6ab	42.23	47.42	36.79	42.1467	5.31549	bc	±	42.15±5.32bc	0.679062	0.646625	0.713063	0.679583	0.0332218	bc	±	0.68±0.03bc
	T4	10054.2	10267.8	10545.3	10289.1	246.242		55.89	160	43.24	22762	24131	22222	23038.3	984.043			111.007	114.57	120.87	115.482	4.99454	a	±	115.48±4.99a	119.74	109.84	112.29	113.96	5.15615	ab	±	113.96±5.16ab	28.3833	34.72	25.97	29.6911	4.51922	cd	±	29.69±4.52cd	0.765604	0.726	0.780688	0.757431	0.0282451	ab	±	0.76±0.03ab
2015	CK	5114.9	5268.3	5554.8	5312.67	223.281		68.41	0	48.66	18025	17866	19015	18302	622.573			54.3005	52.9476	57.67	54.9727	2.43191	c	±	54.97±2.43c	62.7695	64.1224	59.4	63.96	2.43191	c	±	63.96±2.43c	0	0	0	0	0		±	―	―	―	―	―	―		±	―
	T0	8185.6	8411.2	8745.2	8447.33	281.544		68.41	160	48.66	19574	20154	19669	19799	311.087			82.36	88.59	90.24	87.0633	4.15592	b	±	87.06±4.16b	115.07	104.25	108.32	109.21	5.46504	b	±	109.21±5.47b	79.64	84.23	78.51	80.7933	3.02939	a	±	80.79±3.03a	0.462812	0.434125	0.469875	0.455604	0.0189337	c	±	0.46±0.02c
	T1	10263.2	10141.2	9643.2	10015.9	328.453		68.41	160	48.66	23412	21258	22654	22441.3	1092.63			111.17	99.68	97.58	102.81	7.31572	a	±	102.81±7.32a	112.07	105.1	107.38	108.18	3.55376	b	±	108.18±3.55b	53.83	72.29	72.11	66.0767	10.6063	b	±	66.08±10.61b	0.624125	0.50875	0.509875	0.547583	0.0662894	b	±	0.55±0.07b
	T2	10363.7	9878.6	11603.4	10615.2	889.486		68.41	160	48.66	24156	24412	23541	24036.3	447.661			114.78	102.34	132.47	116.53	15.141	a	±	116.53±15.14a	128.66	125.37	116.13	123.39	6.49619	a	±	123.39±6.5a	33.63	49.36	28.47	37.1533	10.8816	c	±	37.15±10.88c	0.750375	0.652063	0.782625	0.728354	0.0680098	a	±	0.73±0.07a
	T3	9524.1	10032.4	9736.8	9764.43	255.274		68.41	160	48.66	22124	21985	22687	22265.3	371.729			98.67	114.52	104.13	105.773	8.05177	a	±	105.77±8.05a	114.64	106.38	104.43	108.48	5.42024	b	±	108.48±5.42b	63.76	56.17	68.51	62.8133	6.22423	b	±	62.81±6.22b	0.562063	0.6095	0.532375	0.567979	0.0389014	b	±	0.57±0.04b
	T4	9974.2	9762.1	10399.5	10045.3	324.588		68.41	160	48.66	24135	23985	23163	23761	523.286			108.14	99.98	115.84	107.987	7.93111	a	±	107.99±7.93a	134.57	126.38	120.37	127.11	7.12784	a	±	127.11±7.13a	34.36	50.71	40.86	41.9767	8.232	c	±	41.98±8.23c	0.745812	0.643625	0.705188	0.698208	0.05145	a	±	0.7±0.05a
													±	18.517	0.92426	e	18.52±0.92e
													±	20.298	0.626395	e	20.3±0.63e	58.89	65.58	63.94	62.8033	62.8																			56.87	52.9517							56.87
													±	22.526	0.596091	d	22.53±0.6d	89.75	105.41	99.34	98.1667	98.17																				52.3474							T0
													±	23.6033	0.787619	c	23.6±0.79c	110.27	98.26	105.12	104.55	104.55																											T1
													±	21.7983	0.625564	b	21.8±0.63b	124.57	108.45	119.24	117.42	117.42																											T2
													±	23.0383	0.984043	a	23.04±0.98a	115.58	106.63	112.94	111.717	111.72																											T3
													±	18.302	0.622573	d	18.3±0.62d	119.74	109.84	112.29	113.957	113.96																											T4
													±	19.799	0.311087	d	19.8±0.31d	68.36	58.64	64.88	63.96	63.96																											CK
													±	22.4413	1.09263	c	22.44±1.09c	115.07	104.25	108.32	109.213	109.21																											T0
													±	24.0363	0.447661	c	24.04±0.45c	112.07	105.1	107.38	108.183	108.18																											T1
													±	22.2653	0.371729	b	22.27±0.37b	128.66	125.37	116.13	123.387	123.39																											T2
													±	23.761	0.523286	a	23.76±0.52a	114.64	106.38	104.43	108.483	108.48																											T3
																		134.57	126.38	120.37	127.107	127.11																											T4
																																																	T0
																																																	T1
																																																	T2
																																																	T3
																																																	T4
																																																	CK
																																																	T0
																																																	T1
																																																	T2
																																																	T3
																																																	T4
[truncated: 8 more columns]

## Sheet: table
Treatment		Ninitial	Ninput	Nmin	Nuptake	Nresidual	Nloss	REU	NUE
2012	CK	55.89	0	43.24	52.36±0.79d	46.77±0.79d	―	―	―			55.89
	T0	55.89	160	43.24	90.93±5.52c	98.17±7.9c	70.04±5.27a	0.51±0.03d	0.57±0.03c
	T1	55.89	160	43.24	108.76±3.27ab	104.55±6.03bc	45.82±4.99b	0.66±0.03c	0.68±0.02ab		5.5908
	T2	55.89	160	43.24	115.89±8.56a	117.42±8.21a	25.82±16.14d	0.78±0.1a	0.72±0.05a
	T3	55.89	160	43.24	105.27±4.04b	111.72±4.6ab	42.15±5.32bc	0.68±0.03bc	0.66±0.03b
	T4	55.89	160	43.24	115.48±4.99a	113.96±5.16ab	29.69±4.52cd	0.76±0.03ab	0.72±0.03a			68.41
2013	CK	68.41	0	48.66	54.97±2.43c	63.96±2.43c	―	―	―
	T0	68.41	160	48.66	87.06±4.16b	109.21±5.47b	80.79±3.03a	0.46±0.02c	0.54±0.03b		6.8409
	T1	68.41	160	48.66	102.81±7.32a	108.18±3.55b	66.08±10.61b	0.55±0.07b	0.64±0.05a
	T2	68.41	160	48.66	116.53±15.14a	123.39±6.5a	37.15±10.88c	0.73±0.07a	0.73±0.09a
	T3	68.41	160	48.66	105.77±8.05a	108.48±5.42b	62.81±6.22b	0.57±0.04b	0.66±0.05a
	T4	68.41	160	48.66	107.99±7.93a	127.11±7.13a	41.98±8.23c	0.7±0.05a	0.67±0.05a

## Sheet: N balance
Treatment		Ninitial	Ninput	Nmin	Nuptake	Nresidual	Nloss
2012	CK	66.34±4.25	0	20.2168	56.23±2.94e	30.32±2.15d	0±1.68d					30.3226	71.7274	0.702865		56.2343
	T0	66.34±4.25	160	20.6979	52.36±0.79e	34.67±1.81d	0±2.02d					34.6744	67.3756	0.660222		52.3635	-3.87074	-0.0688324
	T1	66.34±4.25	160	20.2168	75.65±2.2d	61.25±2.02c	29.67±4.21b		29.67			61.2462	40.8038	0.399841		75.6485
	T2	66.34±4.25	160	20.6979	80.63±2.89c	64.75±2.19c	21.18±3.68c		21.18	8.49	0.286148	64.7501	37.2999	0.365506		80.6287	4.9802	0.0658335
	T3	66.34±4.25	160	20.2168	105.27±4.04b	85.97±3.6b	55.32±7.62a		55.32			85.9744	16.0756	0.157527		105.267
	T4	66.34±4.25	160	20.6979	112.72±1.84a	102.05±6.54a	31.78±4.72b		31.78	23.54	0.425524	102.054				112.724	7.45778	0.0708465
2013	CK	56.87±3.71	0	18.8186	52.95±1.35d	22.74±2.78d	0±4.07d					22.7369	73.6431	0.764092		52.9517
	T0	56.87±3.71	160	13.1088	52.35±1.37d	17.63±4.92d	0±6.05d					17.6314	78.7486	0.817064		52.3474	-0.604324	-0.0114127
	T1	56.87±3.71	160	18.8186	69.38±3.78c	46.02±3.69c	40.29±3.41b		40.29			46.0209	50.3591	0.522506		69.3769
	T2	56.87±3.71	160	13.1088	72.55±4.88c	52.91±3.54c	24.52±8.37c		24.52	15.77	0.391412	52.9092	43.4708	0.451035		72.549	3.17216	0.0457236
	T3	56.87±3.71	160	18.8186	98.20±9.76b	67.37±7.67b	70.11±15.84a		70.11			67.3747	29.0053	0.300948		98.2024
	T4	56.87±3.71	160	13.1088	109.25±1.63a	96.38±4.59a	24.35±4.88c		24.35	45.76	0.652689	96.3781				109.248	11.0452	0.112474

## Sheet: nitrogen use efficiency
Treatment		GY (Ton/ ha)	DM (Ton/ ha)	REU (%)	NUE (%)	PFP (kg/ kg)		REU (%)	NUE (%)	PFP (kg/ kg)
2012	CK	3.75±0.33d	10.12±0.53e	―	―	―
	T0	3.33±0.06d	9.43±0.14e	―	―	―
	T1	4.93±0.39c	12.48±0.36d	17.91±5.26	28.12±1.47	30.84±2.42		0.179059	0.281171	30.8394
	T2	5.19±0.09bc	13.3±0.48c	33.35±4.60	29.45±0.45	32.46±0.54		0.333484	0.294545	32.4631
	T3	5.63±0.14b	15.79±0.61b	42.92±4.67	18.91±0.55	23.45±0.60		0.429194	0.189121	23.451
	T4	6.72±0.36a	16.91±0.28a	60.05±2.95	20.16±0.72	28.01±1.51		0.600493	0.201572	28.0146
2013	CK	3.57±0.24d	9.8±0.25d	―	―	―
	T0	3.24±0.28d	9.68±0.25d	―	―	―
	T1	4.76±0.07c	11.79±0.64c	6.97±4.26	26.48±0.67	29.77±0.44		0.0697218	0.264759	29.7679
	T2	5.53±0.24b	12.33±0.83c	20.30±10.46	29.45±0.77	34.58±1.47		0.202978	0.294454	34.5832
	T3	5.54±0.36b	13.75±1.37b	34.85±9.90	17.34±0.95	23.09±1.49		0.348482	0.173442	23.0886
	T4	6.56±0.08a	15.29±0.23a	60.25±3.05	18.14±1.22	27.34±0.34		0.602535	0.181373	27.3361
